# Supplementary material
Source: MDPI journal article supplement (https://www.mdpi.com/2072-4292/13/12/2424)
Supplement: s1 [file s1]

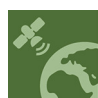

## Supplementary Materials

Integrating ecological assessments to target priority restoration areas: A case study in the Pearl River Delta urban agglomeration, China

**Table S1.** The error matrix of classified and reference data for 2018.

| Year | Classified Image | Reference Data |          |               |           |       |            | Totals | Accuracy/% | Total accuracy/% |
|------|------------------|----------------|----------|---------------|-----------|-------|------------|--------|------------|------------------|
|      |                  | Forest land    | Cropland | Built-up land | Grassland | Water | Unuse land |        |            |                  |
| 2018 | Forest land      | 47             | 2        |               | 1         |       |            | 50     | 96.00      | 94.67            |
|      | Cropland         | 1              | 48       |               | 1         |       |            | 50     | 96.00      |                  |
|      | Built-up land    |                |          | 49            |           |       | 1          | 50     | 98.00      |                  |
|      | Grassland        |                | 3        |               | 46        |       | 1          | 50     | 92.00      |                  |
|      | Water            |                |          |               |           | 50    |            | 50     | 100.00     |                  |
|      | Unuse land       |                |          | 4             | 2         |       | 44         | 50     | 88.00      |                  |

**Table S2.** Attributes of respondents.

|            |                          | Questionnaires (n=361) |
|------------|--------------------------|------------------------|
| Sex        | Male                     | 53.4% (n=193)          |
|            | Female                   | 46.6% (n=168)          |
| Occupation | Farmer                   | 18.9% (n=68)           |
|            | Government department    | 7.3% (n=26)            |
|            | Employee                 | 28.2% (n=102)          |
|            | Researcher               | 3.4% (n=12)            |
|            | Independent entrepreneur | 15.5% (n=56)           |
|            | Student                  | 9.1% (n=33)            |
|            | Retiree                  | 11.4% (n=41)           |
|            | Environmental NGO        | 1.6% (n=6)             |
|            | Others                   | 4.6% (n=17)            |
| Habitation | Urban community          | 56.5% (n=204)          |
|            | Rural community          | 43.5% (n=157)          |

**Table S3.** Weight of land use types of biodiversity index.

| Land use | paddy field | dry land | forest land | shrub | other forest land | high coverage grassland | medium coverage grassland | low coverage grassland | river | lake | wetland |
|----------|-------------|----------|-------------|-------|-------------------|-------------------------|---------------------------|------------------------|-------|------|---------|
| BD       | 0.21        | 0.13     | 2.41        | 1.57  | 1.57              | 1.64                    | 0.82                      | 0.27                   | 2.43  | 2.43 | 2.55    |

**Table S4.** Weight of the outdoor recreation index.

| Component             | Factors (spatial dataset)                          | Assigned score | Distance function thresholds (m) |      |
|-----------------------|----------------------------------------------------|----------------|----------------------------------|------|
|                       |                                                    |                | 50%                              | 0%   |
| Degree of naturalness | Closeness to potential native vegetation           | 0–100          | N/A                              | N/A  |
| Nature protection     | Areas designated as natural parks and scenic areas | 100            | N/A                              | N/A  |
|                       | Areas designated as regional protected areas       | 80             | N/A                              | N/A  |
| Water                 | Lakes, ponds, reservoirs, and wetlands             | 100            | 500                              | 1000 |
|                       | Main river network                                 | 50             | 500                              | 1000 |

**Table S5.** Weight of the land fragile index.

| Type  | Severe erosion | Serious erosion | Moderate erosion | Other land stress |
|-------|----------------|-----------------|------------------|-------------------|
| Value | 0.4            | 0.3             | 0.2              | 0.1               |

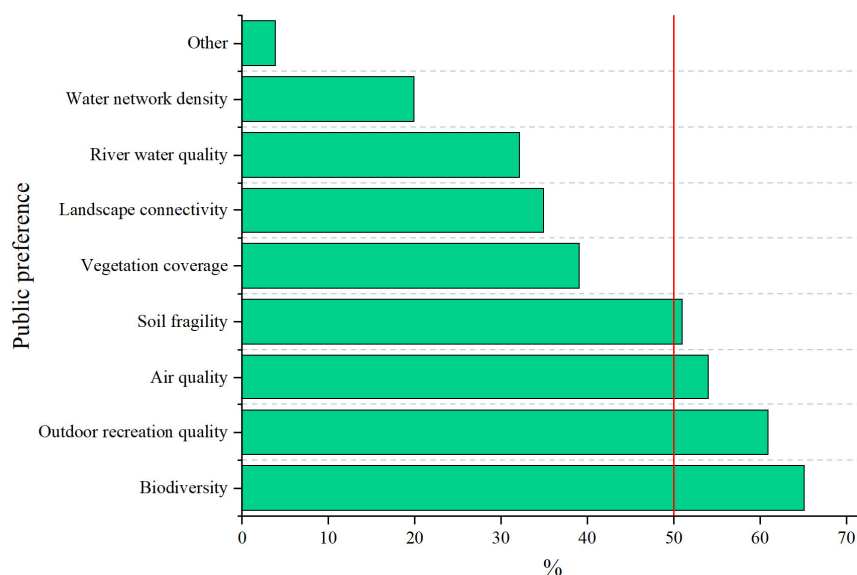**Figure S1.** The public preference of ecological space quality.
